# Supplementary material for: Aggregation favors singlet formation in TES-ADT triplet annihilator for photon upconversion
Source: Royal Society of Chemistry journal article supplement (doi:10.1039/d5sc07013a), 2026-01-01
Supplement: d5sc07013a1.pdf [file d5sc07013a1.pdf]

## Supplementary information

### Aggregation Favors Singlet Formation in TES-ADT Triplet Annihilator for Photon Upconversion

Justas Lekavičius, <sup>a</sup> Edvinas Radiunas, <sup>a</sup> Gediminas Kreiza, <sup>a</sup> Augustina Jozeliūnaitė, <sup>b</sup> Edvinas Orentas <sup>b</sup> and Karolis Kazlauskas <sup>\*a</sup>

<sup>a</sup> Institute of Photonics and Nanotechnology, Vilnius University, Saulėtekio av. 3, LT-10257 Vilnius, Lithuania.

<sup>b</sup> Institute of Chemistry, Faculty of Chemistry and Geosciences, Vilnius University, Naugarduko 24, LT-03225 Vilnius, Lithuania

\*e-mail: [karolis.kazlauskas@ff.vu.lt](mailto:karolis.kazlauskas@ff.vu.lt)

### Determination of TET quantum yields from UC transients

UC transients measured at low excitation power density were approximated by the following function:<sup>1</sup>

$$I_{UC}(t) \propto [T_A]^2 = \left( A \cdot \exp\left(-\frac{t}{\tau_{PdPc}}\right) - B \cdot \exp\left(-\frac{t}{\tau_T}\right) \right)^2, \#(S1)$$

where  $\tau_{PdPc}$  and  $\tau_T$  represent sensitizer and annihilator triplet decay times, respectively. From

this function, UC rise ( $\tau_r$ ) and decay ( $\tau_{UC}$ ) times can be calculated as  $\tau_r = \frac{1}{2}\tau_{PdPc}$  and  $\tau_{UC} = \frac{1}{2}\tau_T$ .

Triplet energy transfer yield ( $\phi_{TET}$ ) was determined from the rise transients of the UC signal using the quenched sensitizer lifetime ( $\tau_{PdPc}$ ) and the natural triplet lifetime of the sensitizer ( $\tau_0$ ) via the following equation:

$$\phi_{TET} = 1 - \frac{\tau_{PdPc}}{\tau_0}. \#(S2)$$

$\tau_0$  was extrapolated from a linear fit of the sensitizer triplet decay rate ( $\tau_{PdPc}^{-1}$ ) plotted against the annihilator concentration.

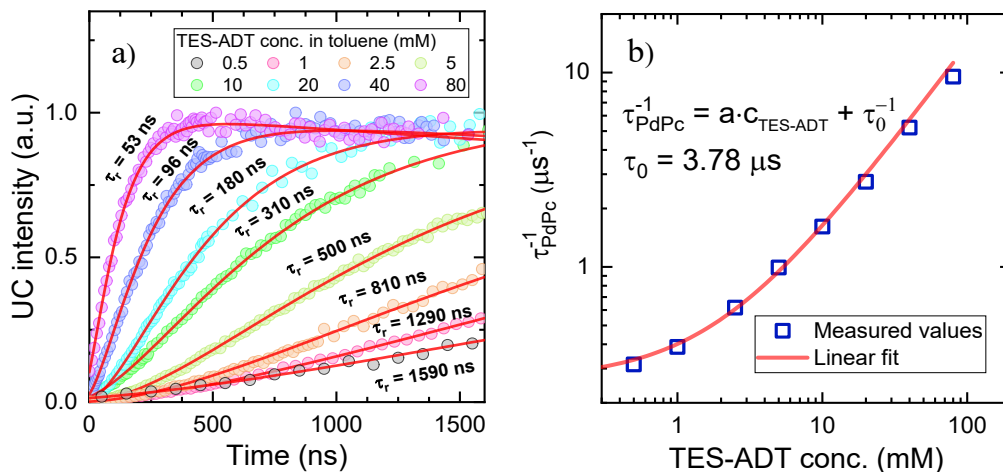

**Fig. S1** a) UC emission rise profiles of TES-ADT: PdPc solutions with a constant sensitizer concentration (15 μM).  $\tau_r (= 0.5\tau_{PdPc})$  is the UC signal rise time. b) Dependence of the sensitizer decay rate ( $\tau_{PdPc}^{-1}$ ) on TES-ADT concentration. A linear fit in the region of 0.5 to 10 mM of TES-ADT was used to determine the intrinsic triplet lifetime ( $\tau_0$ ) of the sensitizer.

### FL quantum yields of TES-ADT: PdPc solutions (corrected for reabsorption)

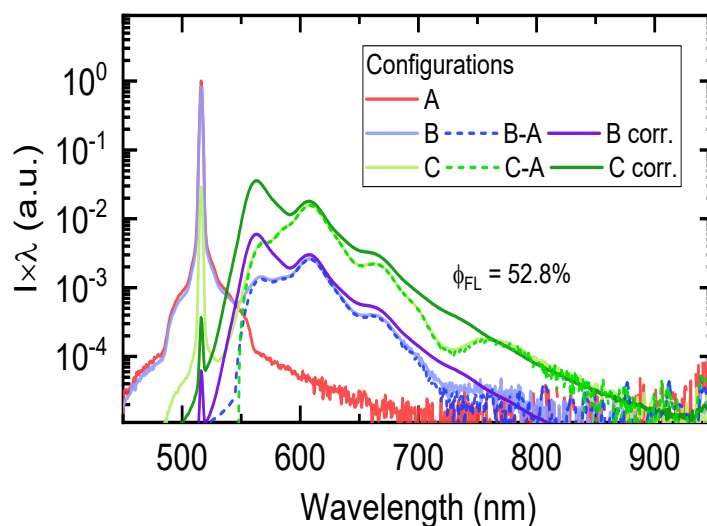

**Fig. S2** Representative data set for FL quantum yield evaluation with an integrating sphere, featuring the UC solution containing 10 mM TES-ADT and 15 μM PdPc. 510 nm CW laser was employed for excitation. In A configuration, the integrating sphere contains only a toluene-filled cuvette as a reference. In B configuration, the sample is excited only by the scattered laser light, whereas in C configuration, the excitation beam passes directly through the

sample. B-A and C-A spectra were obtained by subtracting the reference spectrum (A), serving as a background, from the B and C spectra. B corr. And C corr. Refer to TES-ADT emission spectra measured outside the sphere, which were used to correct for spectral distortions caused by PdPc absorption (around 650 and 730 nm) and TES-ADT self-absorption (around 550 nm) within the integrating sphere. This correction procedure was applied consistently across all TES-ADT concentrations to obtain corrected  $\phi_{FL}$ .

### UC quantum yields of TES-ADT: PdPc solutions (corrected for reabsorption)

UC quantum yields of the samples were evaluated using a comparative method relative to PdPc fluorescence. 15  $\mu$ M PdPc solution in toluene, matching the PdPc concentration in the UC solutions, served as the reference with a known FL quantum yield of  $\phi_{PdPc} = 0.36\%$ . Given that the absorption coefficients of the reference and UC solutions at 730 nm are equal,  $\phi_{UC}$  was calculated using the following formula:

$$\phi_{UC} = \phi_{PdPc} \frac{I_{UC}}{I_{PdPc}}, \#(S3)$$

where  $I_{UC}$  and  $I_{PdPc}$  are spectrally integrated UC and FL<sub>PdPc</sub> intensities of the UC solution and reference, respectively, each multiplied by the emission wavelength.  $\phi_{UC}$  values for each solution were measured at different excitation power densities, as shown in Fig. S5.

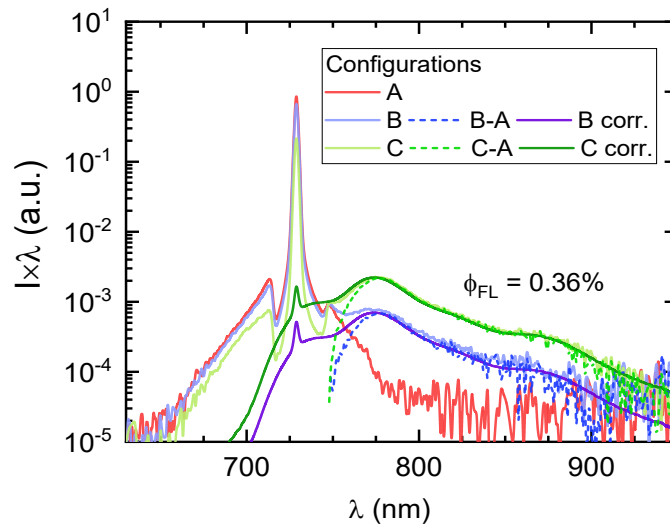

**Fig. S3** Set of spectra used for FL quantum yield evaluation of 15  $\mu$ M PdPc solution in toluene (a reference solution) with an integrating sphere. A 730 nm notch filter was placed in front of

the detector to reduce the intensity of the laser stray light by a factor of 20.64 (measured separately).

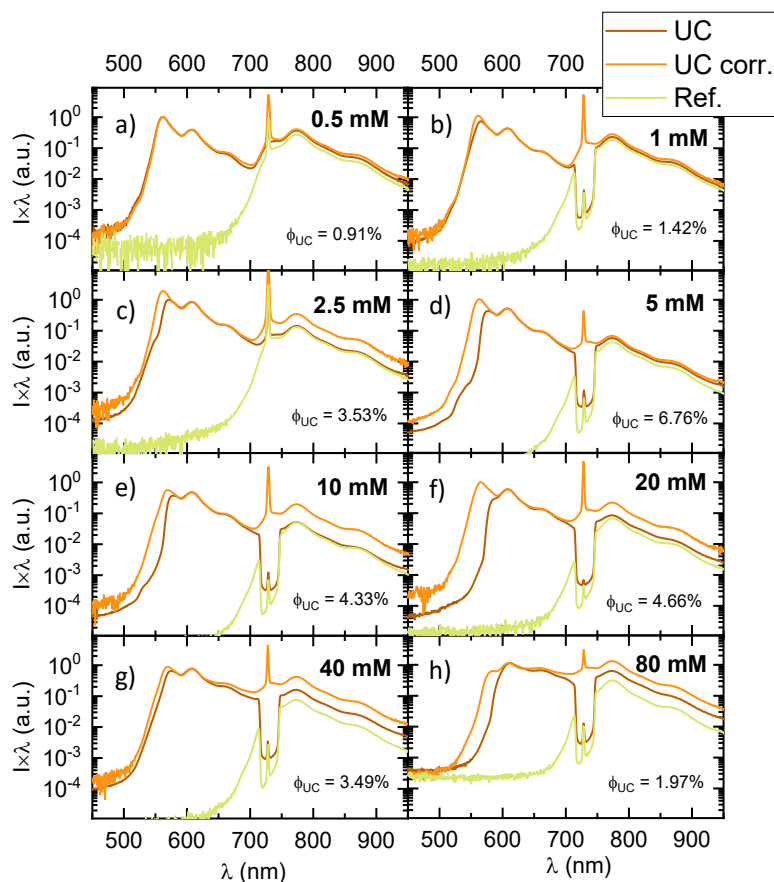

**Fig. S4** (a-h) UC quantum yield estimations for UC solutions (TES-ADT:PdPc) at different annihilator concentrations (indicated), measured by a relative method with 15  $\mu$ M PdPc toluene solution as the reference ( $\phi_{FL} = 0.36\%$ ). Emission spectra of the UC solutions (brown lines) and the reference solution (green lines) were recorded under identical experimental conditions by exciting the center of a 1-mm-thick quartz cuvette. Additional UC spectra (yellow lines) were obtained by exciting the edge of the same cuvette and were used to correct for TES-ADT self-absorption.

## Determination of saturated UC quantum yield and threshold

The saturated UC quantum yield ( $\phi_{UC}^{\infty}$ ), defined as the yield at infinitely high excitation power density, and the excitation threshold ( $I_{th}$ ) were determined from measurements of UC signal

intensity as a function of excitation power density ( $I_{ex}$ ). The data were converted to  $\phi_{UC}$  versus  $I_{ex}$ , considering that

$$\phi_{UC} \propto \frac{I_{UC}}{I_{ex}} \#(S4)$$

and rescaled using known  $\phi_{UC}$  values (see the previous section). The relevant parameters were extracted by fitting the experimental data to the function proposed by *Murakami et al.*:<sup>2</sup>

$$\phi_{UC} = \phi_{UC}^{\infty} \left( 1 + \frac{1 - \sqrt{1 + 4I_{ex}/I_{th}}}{2I_{ex}/I_{th}} \right) \#(S5)$$

In this model,  $I_{th}$  corresponds to the excitation power density at which  $\phi_{UC} = 0.382 \cdot \phi_{UC}^{\infty}$ .

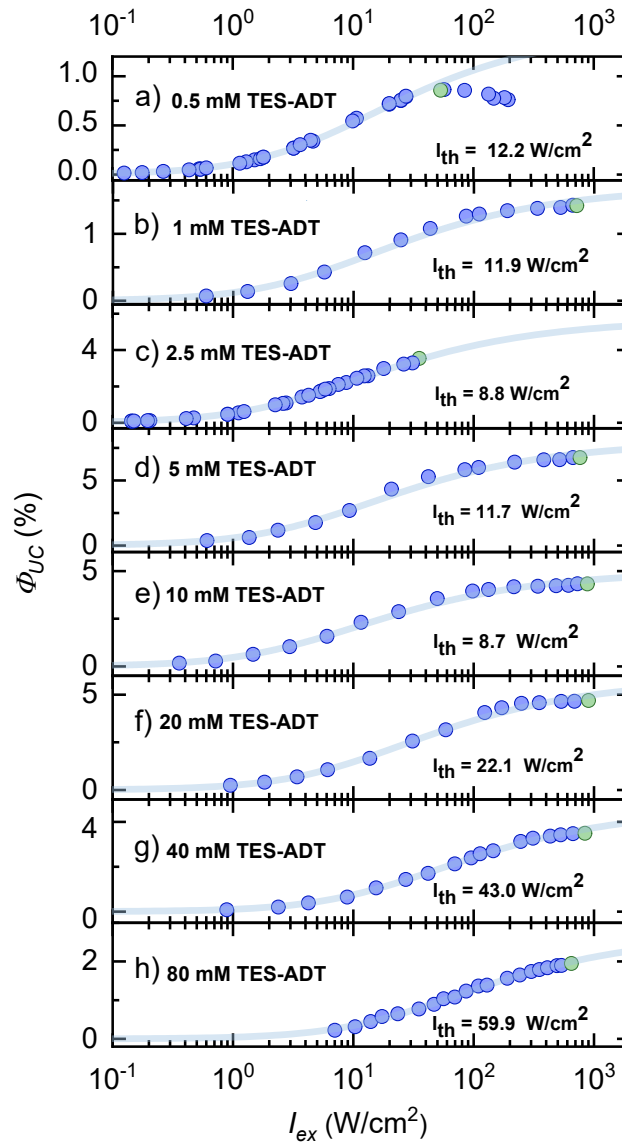

**Fig. S5** (a-h) UC quantum yield as a function of excitation power density  $I_{ex}$  for UC solutions with varying TES-ADT concentration.  $\phi_{UC}$  values measured using a relative method are marked in green.

### FL transients of TES-ADT in toluene

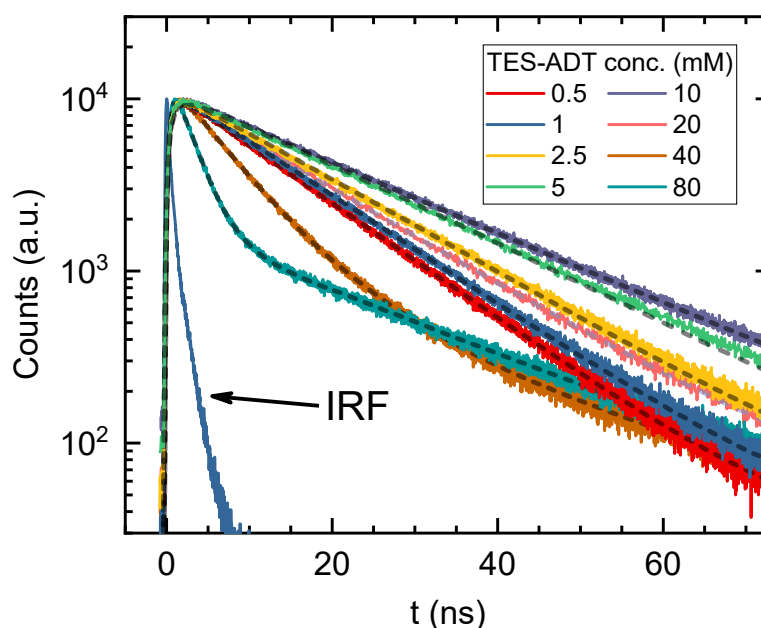

**Fig. S6** FL transients of sensitizer-free TES-ADT in toluene at various concentrations (indicated), excited at 510 nm and detected at 660 nm. IRF, instrument response function. Dashed lines represent single- or multi-exponential fits of the measured transients. The extracted decay lifetimes ( $\tau_1$  and  $\tau_2$ ), along with their fractional contributions ( $c_1$  and  $c_2$ ), are summarized in Table S1.

**Table S1.** FL decay lifetimes  $\tau_i$  and fractional contributions of each decay component  $c_i$  to the overall decay of TES-ADT in toluene.

| TES-ADT conc. (mM) | $\tau_1$ , ns | $c_1$ , % | $\tau_2$ , ns | $c_2$ , % |
|--------------------|---------------|-----------|---------------|-----------|
| 0.5                | 10.8          | 100       | –             | –         |

|     |      |       |      |       |
|-----|------|-------|------|-------|
| 1   | 9.4  | 100   | –    | –     |
| 2.5 | 13.2 | 100   | –    | –     |
| 5   | 15.9 | 100   | –    | –     |
| 10  | 8.9  | 55.20 | 16.6 | 44.80 |
| 20  | 8.4  | 20.36 | 15.1 | 79.64 |
| 40  | 6.0  | 72.52 | 22.8 | 27.48 |
| 80  | 2.0  | 45.35 | 22.4 | 54.65 |

The slight increase in the FL decay lifetime ( $\tau_1$ ) of monomolecular TES-ADT species with rising concentration from 0.5 to 5 mM is attributed to enhanced re-absorption and re-emission effects. The subsequent rapid reduction of this lifetime ( $\tau_1$ ) at TES-ADT concentrations above 10 mM is due to energy transfer from single molecules to lower-energy aggregate states. The appearance of the second FL decay component above 10 mM TES-ADT, with a lifetime ( $\tau_2$ ) in the range of 15-23 ns, is specifically associated with TES-ADT aggregates.

### Spin-statistical factor of TES-ADT:PdPc solid film

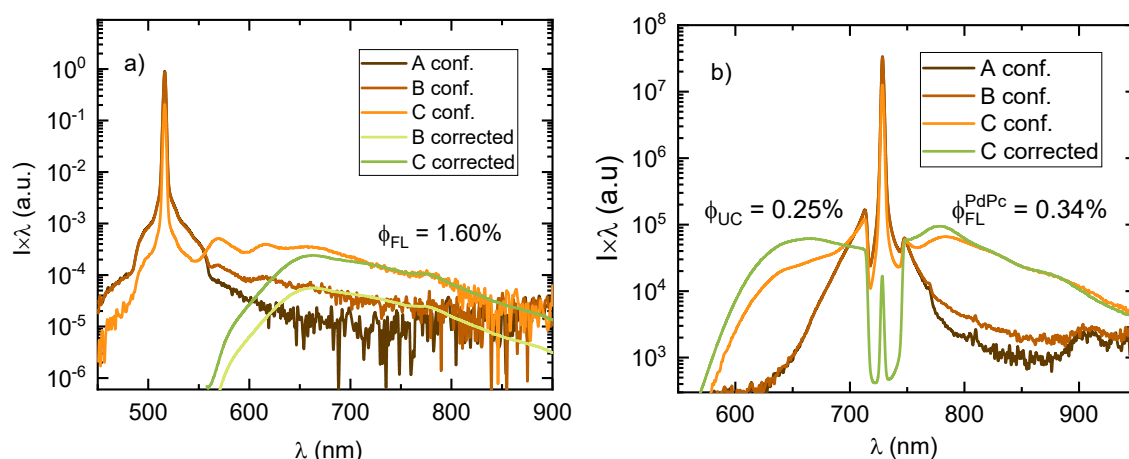

**Fig. S7.** Evaluation of (a) FL and (b) UC quantum yields for a neat TES-ADT film doped with 0.1 wt% PdPc. Both yields were measured using an integrating sphere. The samples were laser-excited at 510 nm for  $\phi_{FL}$  and at 730 nm for  $\phi_{UC}$ . 730 nm notch filter was placed in front of the detector for  $\phi_{UC}$  measurement to reduce the laser stray light by a factor of 41 (measured

separately). FL signal observed between 550 and 650 nm in the integrating sphere measurements (B and C conf.) is attributed to single-molecule emission, likely caused by indirect excitation of the sample edges. This signal was excluded from the final  $\phi_{FL}$  calculations, with the true spectral shape taken from separate correction measurements performed outside the integrating sphere.

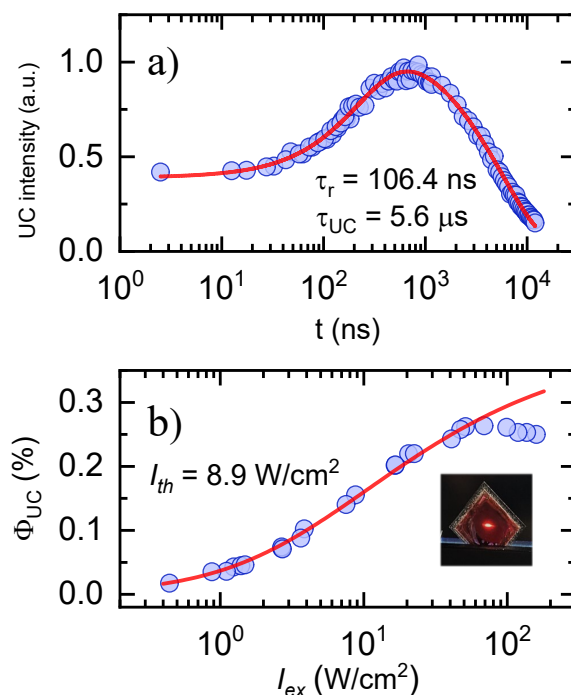

**Fig. S8** a) UC transients and (b)  $\phi_{UC}$  as a function of excitation power density ( $I_{ex}$ ) for neat TES-ADT film doped with 0.1 wt% PdPc. The data was fitted up to 50 W/cm<sup>2</sup>, as experimental values at higher power densities are affected by sample photodegradation.  $\tau_r$  – signal rise time,  $\tau_{UC} = \frac{\tau_T}{2}$  – UC decay time,  $I_{th}$  - excitation threshold power density.

## TES-ADT crystallographic data

**Table S2.** Crystallographic data of TES-ADT crystal.

|                                   |                                                                |
|-----------------------------------|----------------------------------------------------------------|
| Formula                           | C <sub>34</sub> H <sub>38</sub> S <sub>2</sub> Si <sub>2</sub> |
| $D_{calc.}$ (g·cm <sup>-3</sup> ) | 1.154                                                          |
| $\mu$ (mm <sup>-1</sup> )         | 2.325                                                          |



|                             |                |
|-----------------------------|----------------|
| Formula Weight              | 566.94         |
| Colour                      | Red            |
| Shape                       | Plate          |
| Size (mm <sup>3</sup> )     | 0.41×0.23×0.04 |
| Temperature (K)             | 300.1(7)       |
| Crystal system              | triclinic      |
| Space group                 | <i>P</i> 1     |
| a (Å)                       | 6.9092(2)      |
| b (Å)                       | 7.4194(2)      |
| c (Å)                       | 16.6957(5)     |
| $\alpha$ (deg)              | 96.226(2)      |
| $\beta$ (deg)               | 91.986(2)      |
| $\gamma$ (deg)              | 106.077(2)     |
| Volume (Å <sup>3</sup> )    | 815.66(4)      |
| Z                           | 1              |
| Z'                          | 0.5            |
| Wavelength (Å)              | 1.54184        |
| Radiation type              | Cu K $\alpha$  |
| $\theta_{min}$ (deg)        | 2.668          |
| $\theta_{max}$ (deg)        | 77.119         |
| Measured Refl.              | 7857           |
| Independent Refl.           | 3287           |
| Reflections with $I > 2(I)$ | 2862           |
| $R_{int}$                   | 0.0247         |
| Parameters                  | 175            |
| Restraints                  | 3              |
| Largest Peak                | 1.762          |
| Deepest Hole                | -0.768         |
| GooF                        | 1.865          |
| $wR_2$ (all data)           | 0.3991         |

|                  |        |
|------------------|--------|
| $wR_2$           | 0.3878 |
| $R_1$ (all data) | 0.1193 |
| $R_1$            | 0.1122 |

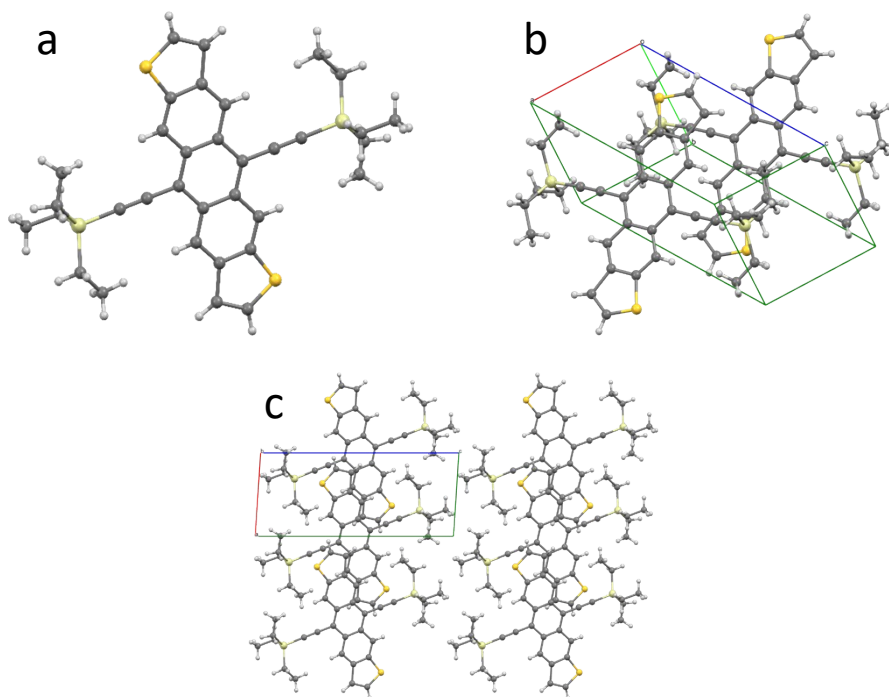

**Fig. S9** Molecular geometry (a) and packing (b-c) of TES-ADT crystals.

## DFT calculations

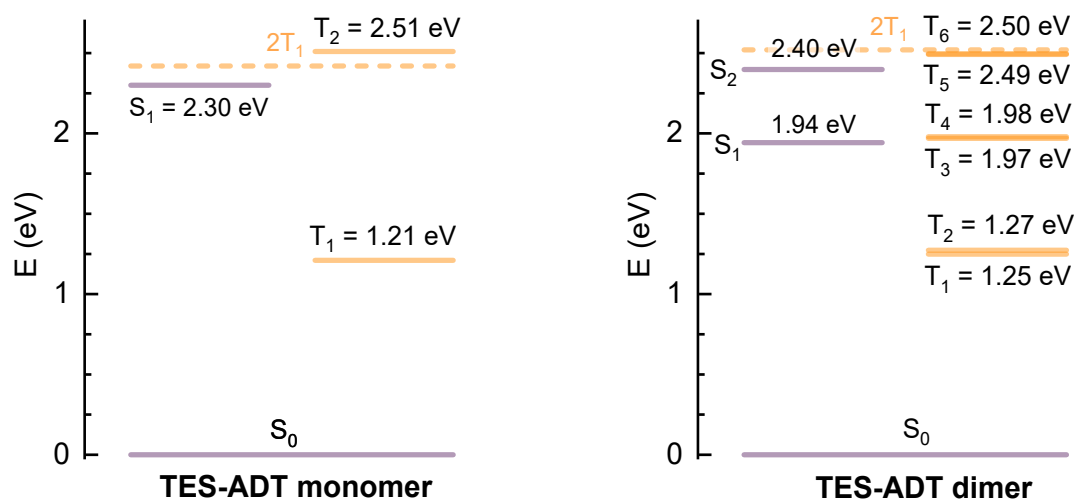

**Fig. S10** Transition energies from ground to excited singlet and triplet states of TES-ADT monomer and dimer, calculated at TD-DFT level. TES-ADT monomer ground state geometry optimization and TD-DFT calculations were performed using B3LYP functional and 6-311G(d) basis set. TES-ADT dimer geometry was obtained from experimental XRD data of a TES-ADT crystal.

**Table S3.** Calculated SOC matrix elements between excited triplet and singlet states for TES-ADT dimer using XRD-derived geometry.

| Molecular state      |                      | SOC matrix elements (cm <sup>-1</sup> ) |
|----------------------|----------------------|-----------------------------------------|
| T <sub>1</sub>       | S <sub>1</sub>       | 0.03                                    |
| <b>T<sub>1</sub></b> | <b>S<sub>2</sub></b> | <b>0.21</b>                             |
| T <sub>2</sub>       | S <sub>1</sub>       | 0.00                                    |
| T <sub>2</sub>       | S <sub>2</sub>       | 0.00                                    |
| T <sub>3</sub>       | S <sub>1</sub>       | 0.00                                    |
| T <sub>3</sub>       | S <sub>2</sub>       | 0.00                                    |
| T <sub>4</sub>       | S <sub>1</sub>       | 0.04                                    |
| <b>T<sub>4</sub></b> | <b>S<sub>2</sub></b> | <b>0.14</b>                             |
| T <sub>5</sub>       | S <sub>1</sub>       | 0.00                                    |
| T <sub>5</sub>       | S <sub>2</sub>       | 0.00                                    |
| <b>T<sub>6</sub></b> | <b>S<sub>1</sub></b> | <b>0.44</b>                             |
| <b>T<sub>6</sub></b> | <b>S<sub>2</sub></b> | <b>0.16</b>                             |

According to the energy scheme in Fig. S10, the energetically viable transitions for the TES-ADT dimer are  $T_6 \rightarrow S_1$  and  $T_6 \rightarrow S_2$ .

## Error analysis

**Triplet energy transfer yield ( $\phi_{TET}$ ).**

Using Eq. (S2), the uncertainty was obtained by standard error propagation from the fitted PdPc lifetimes in the UC sample,  $\tau_{PdPc}$ , and the intrinsic PdPc lifetime,  $\tau_0$ :

$$\Delta\phi_{TET} = \sqrt{\left(\frac{\Delta\tau_{PdPc}}{\tau_0}\right)^2 + \left(\frac{\tau_{PdPc}}{\tau_0^2}\Delta\tau_0\right)^2}. \#(S6)$$

The uncertainty is derived from fits of the UC transient decays for each concentration (Fig. S1a and Fig. 3), while  $\Delta\tau_0$  is common to all samples and obtained from the fit in Fig. S1b ( $\Delta\tau_0 = 299$  ns).

### Fluorescence quantum yield ( $\phi_{FL}$ ).

The dominant uncertainty originates from scaling the correction spectrum  $C_{corr}$  to match the spectrum measured inside the integrating sphere. Variations in  $B_{corr}$  were found to have a negligible impact. We therefore determined limiting cases ( $\phi_{FL}^{low}$  and  $\phi_{FL}^{high}$ ) by varying the  $C_{corr}$  scaling within the range, yielding physically reasonable spectral matching, and used their spread to calculate  $\Delta\phi_{FL}$ . An example of spectral matching under two limiting cases is shown in Fig. S11 for 15  $\mu$ M PdPc solution in toluene, which was used as a reference for the comparative  $\phi_{UC}$  determination.

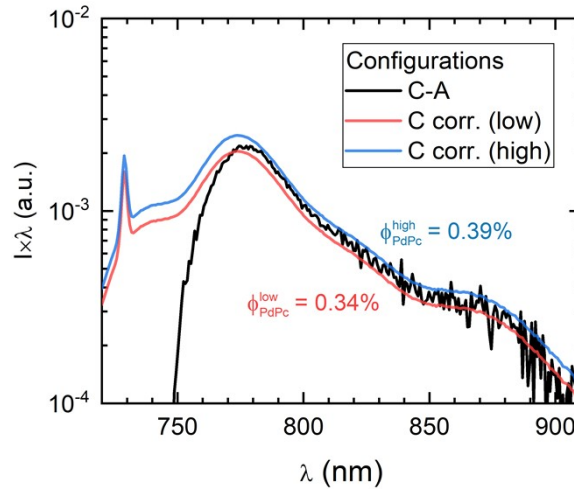

**Fig. S11** Acquisition of the  $\phi_{PdPc}$  value range, achieved by varying the scaling factor of  $C_{corr}$  spectrum.

### Upconversion quantum yield ( $\phi_{UC}$ ).

From Eq. (S3), and assuming the dominant uncertainty arises from the reference yield  $\phi_{PdPc}$  (while spectral integrals  $I_{UC}$  and  $I_{PdPc}$  contribute negligibly due to high signal-to-background; Fig. S4), we estimate:

$$\Delta\phi_{UC} \approx \frac{\Delta\phi_{PdPc}}{\phi_{PdPc}} \phi_{UC} \#(S7)$$

which gives a constant relative uncertainty  $\frac{\Delta\phi_{UC}}{\phi_{UC}} \approx 0.11$  for all solutions.

#### Asymptotic UC quantum yield ( $\phi_{UC}^{\infty}$ ).

$\phi_{UC}^{\infty}$  was obtained by fitting (Fig. S5). The relative fit error  $\left(\frac{\Delta\phi_{UC}^{\infty}}{\phi_{UC}^{\infty}}\right)_{fit}$  is found to be small (0.001–0.025) compared to the propagated uncertainty from  $\phi_{UC}$  ( $\frac{\Delta\phi_{UC}}{\phi_{UC}} \approx 0.11$ ), hence:

$$\Delta\phi_{UC}^{\infty} \approx \frac{\Delta\phi_{UC}}{\phi_{UC}} \phi_{UC}^{\infty} \approx \frac{\Delta\phi_{PdPc}}{\phi_{PdPc}} \phi_{UC}^{\infty} \#(S8)$$

#### Spin-statistical factor ( $f$ ).

Finally,  $\Delta f$  was obtained by propagating uncertainties in  $\phi_{UC}^{\infty}$ ,  $\phi_{FL}$ , and  $\phi_{TET}$ :

$$\Delta f = f \sqrt{\left(\frac{\Delta\phi_{UC}^{\infty}}{\phi_{UC}^{\infty}}\right)^2 + \left(\frac{\Delta\phi_{TET}}{\phi_{TET}}\right)^2 + \left(\frac{\Delta\phi_{FL}}{\phi_{FL}}\right)^2} \#(S9)$$

All resulting uncertainties are summarized in Table S4 and are reflected directly as the error bars in Fig. 5, thereby quantifying the range of  $f$  values supported by the measurements.

**Table S4.** Propagated uncertainties for all experimentally determined and derived photophysical parameters used in the error analysis, as a function of TES-ADT concentration.

| $c_{TES-ADT}$<br>(mM) | $\Delta\tau_{PdPc}$<br>(ns) | $\Delta\phi_{TET}$<br>(%) | $\Delta\phi_{FL}$<br>(%) | $\Delta\phi_{UC}$<br>(%) | $\Delta\phi_{UC}^{\infty}$<br>(%) | $\Delta f$<br>(%) |
|-----------------------|-----------------------------|---------------------------|--------------------------|--------------------------|-----------------------------------|-------------------|
| 0.5                   | 34                          | 6.72                      | 6.65                     | 0.10                     | 0.16                              | 10.14             |
| 1                     | 13                          | 5.41                      | 4.14                     | 0.15                     | 0.19                              | 2.91              |
| 2.5                   | 7                           | 3.40                      | 4.29                     | 0.38                     | 0.62                              | 4.28              |
| 5                     | 5                           | 2.10                      | 2.75                     | 0.74                     | 0.87                              | 4.37              |
| 10                    | 3                           | 1.30                      | 2.96                     | 0.47                     | 0.54                              | 2.80              |
| 20                    | 2                           | 0.76                      | 4.28                     | 0.51                     | 0.63                              | 6.78              |
| 40                    | 1                           | 0.40                      | 1.56                     | 0.38                     | 0.50                              | 7.02              |
| 80                    | 1                           | 0.22                      | 1.05                     | 0.22                     | 0.29                              | 8.92              |
| UC film               | 5                           | 0.46                      | 0.23                     | 0.04                     | 0.06                              | 10.60             |

## Impact of triplet recycling on the spin-statistical factor

Back-FRET not only lowers the observed annihilator fluorescence yield ( $\phi_{FL}$ ) but can also recycle excitations by generating new sensitizer triplets, potentially biasing the inferred  $f$ . To quantify this, we introduce a simple steady-state recycling model for the TTA-dominated regime ( $\phi_{TTA} \approx 1$ ). Without recycling, the standard relation is

$$\phi_{UC}^{\infty} = \frac{1}{2} \phi_{ISC} \phi_{TET} f \phi_{FL}. \quad \#(S10)$$

Including recycling, each loop contributes a factor

$$\alpha = \frac{1}{2} \phi_{ISC} \phi_{TET} f \phi_{bFRET}, \quad \#(S11)$$

meaning that a fraction  $\alpha$  of the triplet population is regenerated in each successive back-FRET/ISC/TET cycle. Consequently, the effective triplet yield equals the sum of the initial and recycled contributions,  $r_{eff} = r_0(1 + \alpha + \alpha^2 + \dots) = r_0/(1 - \alpha)$  (for  $|\alpha| < 1$ ). Therefore, the effective triplet yield is multiplied by  $1/(1 - \alpha)$ , giving

$$\phi_{UC,eff}^{\infty} = \frac{\phi_{ISC} \phi_{TET} f \phi_{FL}}{2 - f \phi_{ISC} \phi_{TET} \phi_{bFRET}}. \quad \#(S12)$$

Solving for the intrinsic  $f$  (denoted  $f_i$ ) yields

$$f_i = \frac{2\phi_{UC,eff}^{\infty}}{\phi_{ISC} \phi_{TET} (\phi_{FL} + \phi_{bFRET} \phi_{UC,eff}^{\infty})}. \quad \#(S13)$$

To estimate  $\phi_{bFRET}$  under the most demanding solid-state conditions, where back-FRET is strongest, we prepared neat TES-ADT films and films with 0.1 wt% PdPc under identical spin-coating conditions. The FL quantum yield was found to decrease from 3.20% to 2.17%, giving

$$\phi_{bFRET} = 1 - \phi_{FL}^{wPdPc} / \phi_{FL} = 0.322. \quad \#(S14)$$

Using the film parameters in the manuscript ( $\phi_{UC,eff}^{\infty} = 0.004$ ,  $\phi_{FL} = 0.016$ ,  $\phi_{ISC} = 1$ ,  $\phi_{TET} = 0.944$ ) yields  $f_i = 49.0\%$ , compared to  $f = (53.0 \pm 10.6)\%$  from Eq. S10 without recycling. Thus, even in this worst-case scenario, triplet recycling via back-FRET changes  $f$  by only  $\sim 4$  percentage points. As this is well within our experimental uncertainty, it does not affect the conclusions.

## References

- 1 E. Radiunas, S. Raišys, S. Juršėnas, A. Jozeliūnaitė, T. Javorskis, U. Šinkevičiūtė, E. Orentas and K. Kazlauskas, *J. Mater. Chem. C*, 2020, **8**, 5525–5534.
- 2 Y. Murakami and K. Kamada, *Phys. Chem. Chem. Phys.*, 2021, **23**, 18268–18282.
